# Supplementary material
Source: Springer Nature journal article supplement (https://www.springermedizin.de/resource/supplementary/12958_2008_506_MOESM2_ESM.pdf/9568168)

A

No primer

Lamin A/C

PDE5

1kb ladder

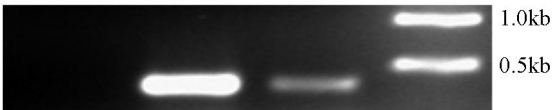

B

kDa

3.0 1.0 0.2 0 (ug)

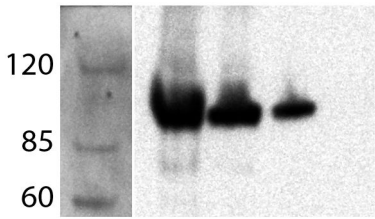

Supplement: MOESM2 [file 9568168]
